# Supplementary material for: Sorafenib Repurposing for Ophthalmic Delivery by Lipid Nanoparticles: A Preliminary Study
Source: MDPI journal article supplement (doi:10.3390/pharmaceutics13111956), 2021-11-18
Supplement: s1 [file s1]

# Supplementary Materials: Sorafenib Repurposing for Ophthalmic Delivery by Lipid Nanoparticles: a Preliminary Study

Angela Bonaccorso, Veronica Pepe, Cristina Zappulla, Cinzia Cimino, Angelo Pricoco, Giovanni Puglisi, Francesco Giuliano, Rosario Pignatello and Claudia Carbone

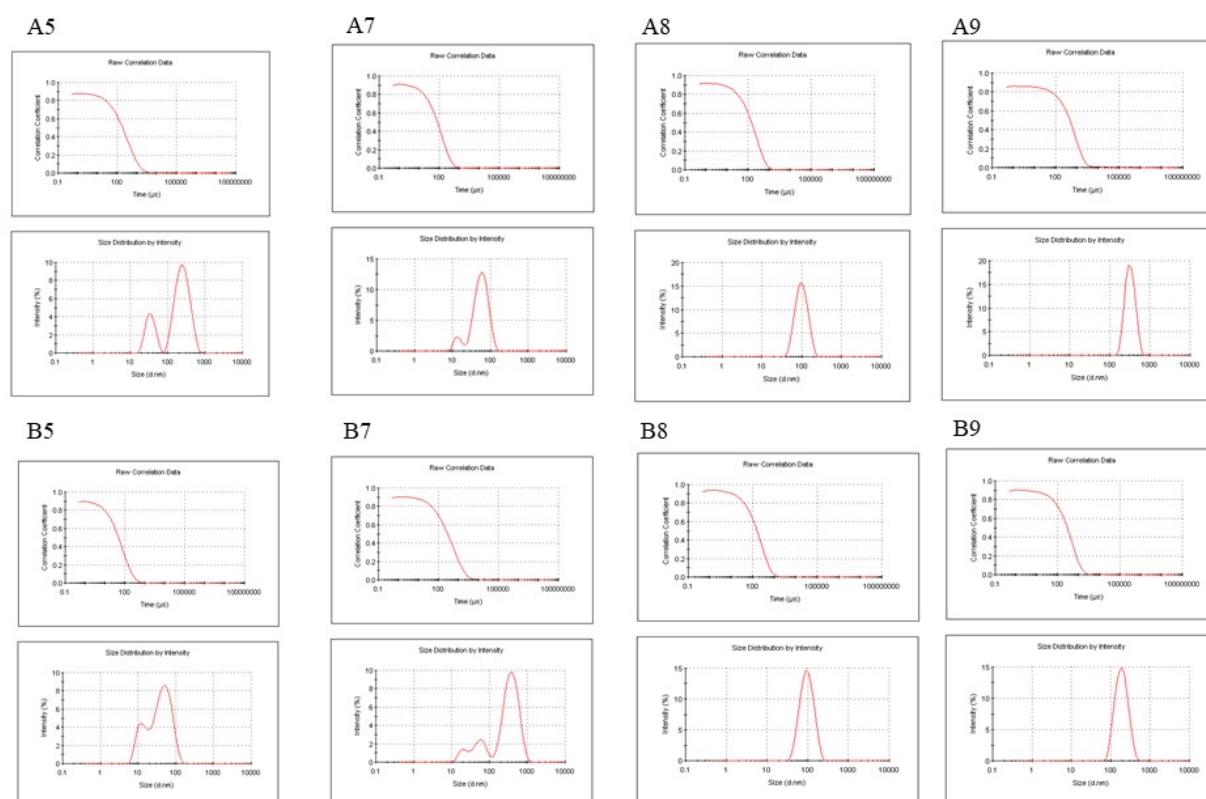

**Figure S1.** Intensity correlation functions of light scattered at 90° and hydrodynamic radius distribution by intensity of SLN prepared with different amount of Softisan (A5, A7, A8 and A9) or Suppocire (B5, B7, B8 and B9).

**Table S1.** Mean particles size (Z-Ave, [nm]) and polydispersity index (PDI, [a.u.])  $\pm$  standard deviation (SD) of unloaded SLN A8, B8 and B9 stored in Turbiscan® at  $25.0 \pm 1.0$  °C and analysed at different time intervals. Each value is the average of six different replicates  $\pm$  standard deviation (SD).

|                                        | Sample  | A8                | B8                 | B9                |
|----------------------------------------|---------|-------------------|--------------------|-------------------|
| <b>Zave <math>\pm</math> S.D. (nm)</b> | 1 week  | 135.1 $\pm$ 1.15  | 71.60 $\pm$ 1.12   | 125.5 $\pm$ 3.11  |
|                                        | 2 weeks | 135.8 $\pm$ 1.7   | 108.4 $\pm$ 0.4    | 145.6 $\pm$ 1.8   |
|                                        | 3 weeks | 138.7 $\pm$ 0.4   | 183.1 $\pm$ 1.4*   | 129.1 $\pm$ 1.4   |
|                                        | 4 weeks | 136.5 $\pm$ 2.9   | 287.4 $\pm$ 1.3*   | 156.1 $\pm$ 0.8   |
| <b>PDI <math>\pm</math> S.D.</b>       | 1 week  | 0.124 $\pm$ 0.023 | 0.123 $\pm$ 0.013  | 0.111 $\pm$ 0.025 |
|                                        | 2 weeks | 0.131 $\pm$ 0.014 | 0.226 $\pm$ 0.011  | 0.119 $\pm$ 0.009 |
|                                        | 3 weeks | 0.090 $\pm$ 0.021 | 0.378 $\pm$ 0.003* | 0.106 $\pm$ 0.014 |
|                                        | 4 weeks | 0.057 $\pm$ 0.047 | 0.370 $\pm$ 0.004* | 0.091 $\pm$ 0.022 |

\* Significance for  $p < 0.05$ , compared to the initial value.
